# Supplementary material
Source: PubMed Central journal article supplement (PMC3003091)
Supplement: 1012153107_sapp.pdf [file 1012153107_sapp.pdf]

Table S1. The time-line of the pull-down method

| Day                                                                                 | Task                                                                                                    | time    |
|-------------------------------------------------------------------------------------|---------------------------------------------------------------------------------------------------------|---------|
| 1                                                                                   | Harvest lymphoblastoid cells or blood drawing                                                           | 30 min  |
|                                                                                     | ↓                                                                                                       |         |
|                                                                                     | Extraction of total RNA                                                                                 | 45 min  |
|                                                                                     | ↓                                                                                                       |         |
|                                                                                     | cDNA synthesis by reverse transcription                                                                 | 110 min |
|                                                                                     | ↓                                                                                                       |         |
|                                                                                     | The process of the pull-down method (details in Methods)                                                | 125 min |
|                                                                                     | 01. Preparation of the annealing mixture containing cDNA (100 ng) and biotinylated RNA probe (100 pmol) | 5 min   |
|                                                                                     | ↓                                                                                                       |         |
|                                                                                     | 02. Heat-denaturation at 95 °C for 5 min                                                                | 5 min   |
|                                                                                     | ↓                                                                                                       |         |
|                                                                                     | 03. Annealing at room temperature                                                                       | 30 min  |
|                                                                                     | ↓                                                                                                       |         |
| 04. Add streptavidin-resin to the mixture                                           | 5 min                                                                                                   |         |
| ↓                                                                                   |                                                                                                         |         |
| 05. Incubation at 37 °C with gentle agitation                                       | 60 min                                                                                                  |         |
| ↓                                                                                   |                                                                                                         |         |
| 06. Wash the resin with wash buffer followed by centrifugation 3 times              | 10 min                                                                                                  |         |
| ↓                                                                                   |                                                                                                         |         |
| 07. Elution and collection of cDNA fragments from the resin by 5 mM biotin solution | 10 min                                                                                                  |         |
| ↓                                                                                   |                                                                                                         |         |
| SNP typing by the TaqMan SNP Genotyping assay                                       | 120 min                                                                                                 |         |
| Examination of trinucleotide repeat sequences by PCR and gel electrophoresis        |                                                                                                         |         |



Table S3: Genotype of the cSNPs in the *HTT* gene in HD patients and healthy individuals

| SNP ID   | Exon | Alleles | Heterozygosity <sup>a)</sup> | HD patients |       |       |       |       |       |       | Healthy individuals |  |
|----------|------|---------|------------------------------|-------------|-------|-------|-------|-------|-------|-------|---------------------|--|
|          |      |         |                              | C0142       | C0160 | C0166 | C0221 | C0222 | HD995 | N0001 | N0002               |  |
| rs363099 | 29   | C/T     | 0.333                        | C/T         | T/T   | C/C   | C/T   | T/T   | T/T   | C/C   | C/T                 |  |
| rs362331 | 50   | C/T     | 0.494                        | C/T         | C/C   | C/T   | C/C   | C/C   | C/C   | T/T   | C/T                 |  |
| rs362273 | 57   | A/G     | 0.370                        | A/G         | G/G   | A/A   | A/G   | G/G   | G/G   | A/A   | A/G                 |  |
| rs362272 | 61   | A/G     | 0.374                        | A/G         | A/A   | G/G   | A/G   | A/A   | A/A   | G/G   | A/G                 |  |

<sup>a)</sup> The heterozygosities are derived from the NCBI Entrez dbSNP database: <http://www.ncbi.nlm.nih.gov/snp>.

Table S4. Synthetic siRNA sequences targeting cSNP sites (1/2)

| SNP ID (alleles)              | siRNA name                    |                               | 5' - sequence - 3' <sup>(b)</sup> |                                |
|-------------------------------|-------------------------------|-------------------------------|-----------------------------------|--------------------------------|
| rs363099 (C/T)                | siRNAs targeting the C-allele |                               |                                   |                                |
|                               | siRs099_C9                    | ss <sup>a)</sup>              | GGGUUUCU <u>C</u> CGCUCAGCCUUU    |                                |
|                               |                               | as                            | AGGCUGAGCGGAGAAACCCUU             |                                |
|                               | siRs099_C10                   | ss                            | AGGGUUUCU <u>C</u> CGCUCAGCCUU    |                                |
|                               |                               | as                            | GGCUGAGCGGAGAAACCCUUU             |                                |
|                               | siRs099_C11                   | ss                            | GAGGGUUUCU <u>C</u> CGCUCAGCUU    |                                |
|                               |                               | as                            | GCUGAGCGGAGAAACCCUCUU             |                                |
|                               | siRs099_C12                   | ss                            | GGAGGGUUUCU <u>C</u> CGCUCAGUU    |                                |
|                               |                               | as                            | CUGAGCGGAGAAACCCUCCUU             |                                |
|                               | siRNAs targeting the T-allele |                               |                                   |                                |
|                               | siRs099_T9                    | ss                            | GGGUUUCU <u>U</u> CGCUCAGCCUUU    |                                |
|                               |                               | as                            | AGGCUGAGCGAAGAAACCCUU             |                                |
|                               | siRs099_T10                   | ss                            | AGGGUUUCU <u>U</u> CGCUCAGCCUU    |                                |
|                               |                               | as                            | GGCUGAGCGAAGAAACCCUUU             |                                |
|                               | siRs099_T11                   | ss                            | GAGGGUUUCU <u>U</u> CGCUCAGCUU    |                                |
|                               |                               | as                            | GCUGAGCGAAGAAACCCUCUU             |                                |
|                               | siRs099_T12                   | ss                            | GGAGGGUUUCU <u>U</u> CGCUCAGUU    |                                |
|                               |                               | as                            | CUGAGCGAAGAAACCCUCCUU             |                                |
|                               | rs362331 (C/T)                | siRNAs targeting the C-allele |                                   |                                |
|                               |                               | siRs331_C8                    | ss                                | CCCUCAU <u>C</u> CACUGUGUGCAUU |
|                               |                               |                               | as                                | UGCACACAGUGGAUGAGGGUU          |
|                               |                               | siRs331_C9                    | ss                                | CCCUCAU <u>C</u> CACUGUGUGCAUU |
|                               |                               |                               | as                                | UGCACACAGUGGAUGAGGGUU          |
|                               |                               | siRs331_C10                   | ss                                | UCCCUCAU <u>C</u> CACUGUGUGCUU |
| as                            |                               |                               | GCACACAGUGGAUGAGGGAUU             |                                |
| siRs331_C11                   |                               | ss                            | CUCCCUCAU <u>C</u> CACUGUGUGUU    |                                |
|                               |                               | as                            | CACACAGUGGAUGAGGGAGUU             |                                |
| siRs331_C12                   |                               | ss                            | GCUCCCUCAU <u>C</u> CACUGUGUUU    |                                |
|                               |                               | as                            | ACACAGUGGAUGAGGGAGCUU             |                                |
| siRNAs targeting the T-allele |                               |                               |                                   |                                |
| siRs331_T8                    |                               | ss                            | CCCUCAU <u>U</u> CACUGUGUGCAUU    |                                |
|                               |                               | as                            | UGCACACAGUGAUGAGGGUU              |                                |
| siRs331_T9                    |                               | ss                            | CCCUCAU <u>U</u> CACUGUGUGCAUU    |                                |
|                               |                               | as                            | UGCACACAGUAGAUGAGGGUU             |                                |
| siRs331_T10                   |                               | ss                            | UCCCUCAU <u>U</u> CACUGUGUGCUU    |                                |
|                               |                               | as                            | GCACACAGUAGAUGAGGGAUU             |                                |
| siRs331_T11                   |                               | ss                            | CUCCCUCAU <u>U</u> CACUGUGUGUU    |                                |
|                               |                               | as                            | CACACAGUAGAUGAGGGAGUU             |                                |
| siRs331_T12                   |                               | ss                            | GCUCCCUCAU <u>U</u> CACUGUGUUU    |                                |
|                               |                               | as                            | ACACAGUAGAUGAGGGAGCUU             |                                |

Table S4. Synthetic siRNA sequences targeting cSNP sites (2/2)

| SNP ID (alleles)              | siRNA name                    |                               | 5' - sequence - 3' <sup>b)</sup> |                                |
|-------------------------------|-------------------------------|-------------------------------|----------------------------------|--------------------------------|
| rs362273 (A/G)                | siRNAs targeting the A-allele |                               |                                  |                                |
|                               | siRs273_A8                    | ss                            | UGCUGCU <u>A</u> CAGAUCAACCCUU   |                                |
|                               |                               | as                            | GGGUUGAUCUG <u>U</u> AGCAGCAUU   |                                |
|                               | siRs273_A9                    | ss                            | CUGCUGCU <u>A</u> CAGAUCAACCCUU  |                                |
|                               |                               | as                            | GGUUGAUCUG <u>U</u> AGCAGCAGUU   |                                |
|                               | siRs273_A10                   | ss                            | GCUGCUGCU <u>A</u> CAGAUCAACUU   |                                |
|                               |                               | as                            | GUUGAUCUG <u>U</u> AGCAGCAGCUU   |                                |
|                               | siRs273_A11                   | ss                            | AGCUGCUGCU <u>A</u> CAGAUCAAUU   |                                |
|                               |                               | as                            | UUGAUCUG <u>U</u> AGCAGCAGCUUU   |                                |
|                               | siRs273_A12                   | ss                            | AAGCUGCUGCU <u>A</u> CAGAUCAUU   |                                |
|                               |                               | as                            | UGAUCUG <u>U</u> AGCAGCAGCUUUU   |                                |
|                               | siRNAs targeting the G-allele |                               |                                  |                                |
|                               | siRs273_G8                    | ss                            | UGCUGCU <u>G</u> CAGAUCAACCCUU   |                                |
|                               |                               | as                            | GGGUUGAUCUG <u>C</u> AGCAGCAUU   |                                |
|                               | siRs273_G9                    | ss                            | CUGCUGCU <u>G</u> CAGAUCAACCCUU  |                                |
|                               |                               | as                            | GGUUGAUCUG <u>C</u> AGCAGCAGUU   |                                |
|                               | siRs273_G10                   | ss                            | GCUGCUGCU <u>G</u> CAGAUCAACUU   |                                |
|                               |                               | as                            | GUUGAUCUG <u>C</u> AGCAGCAGCUU   |                                |
|                               | siRs273_G11                   | ss                            | AGCUGCUGCU <u>G</u> CAGAUCAAUU   |                                |
|                               |                               | as                            | UUGAUCUG <u>C</u> AGCAGCAGCUUU   |                                |
|                               | siRs273_G12                   | ss                            | AAGCUGCUGCU <u>G</u> CAGAUCAUU   |                                |
|                               |                               | as                            | UGAUCUG <u>C</u> AGCAGCAGCUUUU   |                                |
|                               | rs362272 (A/G)                | siRNAs targeting the A-allele |                                  |                                |
|                               |                               | siRs272_A8                    | ss                               | GCACGGC <u>A</u> UCCUCUAUGUGUU |
|                               |                               | as                            | CACAUAGAGGA <u>U</u> GCCGUGCUU   |                                |
| siRs272_A9                    |                               | ss                            | UGCACGGC <u>A</u> UCCUCUAUGUUU   |                                |
|                               |                               | as                            | ACAUAGAGGA <u>U</u> GCCGUGCAUU   |                                |
| siRs272_A10                   |                               | ss                            | CUGCACGGC <u>A</u> UCCUCUAUGUU   |                                |
|                               |                               | as                            | CAUAGAGGA <u>U</u> GCCGUGCAGUU   |                                |
| siRs272_A11                   |                               | ss                            | CCUGCACGGC <u>A</u> UCCUCUAUUU   |                                |
|                               |                               | as                            | AUAGAGGA <u>U</u> GCCGUGCAGGUU   |                                |
| siRs272_A12                   |                               | ss                            | CCCUGCACGGC <u>A</u> UCCUCUAUU   |                                |
|                               |                               | as                            | UAGAGGA <u>U</u> GCCGUGCAGGGUU   |                                |
| siRNAs targeting the G-allele |                               |                               |                                  |                                |
| siRs272_G8                    |                               | ss                            | GCACGGC <u>G</u> UCCUCUAUGUGUU   |                                |
|                               |                               | as                            | CACAUAGAGGA <u>C</u> GCCGUGCUU   |                                |
| siRs272_G9                    |                               | ss                            | UGCACGGC <u>G</u> UCCUCUAUGUUU   |                                |
|                               |                               | as                            | ACAUAGAGGA <u>C</u> GCCGUGCAUU   |                                |
| siRs272_G10                   |                               | ss                            | CUGCACGGC <u>G</u> UCCUCUAUGUU   |                                |
|                               |                               | as                            | CAUAGAGGA <u>C</u> GCCGUGCAGUU   |                                |
| siRs272_G11                   |                               | ss                            | CCUGCACGGC <u>G</u> UCCUCUAUUU   |                                |
|                               |                               | as                            | AUAGAGGA <u>C</u> GCCGUGCAGGUU   |                                |
| siRs272_G12                   |                               | ss                            | CCCUGCACGGC <u>G</u> UCCUCUAUU   |                                |
|                               |                               | as                            | UAGAGGA <u>C</u> GCCGUGCAGGGUU   |                                |

<sup>a)</sup> ss: sense-strand, as: antisense-strand.

<sup>b)</sup> The nucleotides corresponding to the SNP sites are underlined.

Table S5. Mismatched siRNA sequences

| SNP ID (alleles)              | SNP position | Mismatched position | siRNA name       | 5' - sequence - 3' <sup>b)</sup>                                                                                                                                |
|-------------------------------|--------------|---------------------|------------------|-----------------------------------------------------------------------------------------------------------------------------------------------------------------|
| <b>rs363099 (C/T)</b>         |              |                     |                  |                                                                                                                                                                 |
| siRNAs targeting the C-allele |              |                     |                  |                                                                                                                                                                 |
|                               | 9            | 13                  | siRs099_C9(A13)  | SS <sup>a)</sup><br>GGG <u>UUU</u> CU <u>CC</u> GGcA <u>CA</u> GC <u>UUU</u><br>AGG <u>CU</u> G <u>u</u> GC <u>GG</u> GA <u>AAAA</u> CC <u>UUU</u>              |
|                               | 9            | 14                  | siRs099_C9(G14)  | SS<br>GGG <u>UUU</u> CU <u>CC</u> GC <u>U</u> gA <u>GC</u> CU <u>UU</u><br>AGG <u>CU</u> cA <u>GC</u> GG <u>GA</u> AA <u>AA</u> CC <u>UUU</u>                   |
|                               | 9            | 15                  | siRs099_C9(U15)  | SS<br>GGG <u>UUU</u> CU <u>CC</u> GC <u>U</u> C <u>u</u> GC <u>UUU</u><br>AGG <u>Ca</u> GA <u>G</u> CG <u>GA</u> AA <u>AA</u> CC <u>UUU</u>                     |
|                               | 9            | 16                  | siRs099_C9(U16)  | SS<br>GGG <u>UUU</u> CU <u>CC</u> GC <u>U</u> CA <u>u</u> CC <u>UUU</u><br>AGG <u>u</u> GA <u>G</u> CG <u>GA</u> AA <u>AA</u> CC <u>UUU</u>                     |
| <b>rs362331 (C/T)</b>         |              |                     |                  |                                                                                                                                                                 |
| siRNAs targeting the C-allele |              |                     |                  |                                                                                                                                                                 |
|                               | 9            | 14                  | siRs331_C9(A14)  | SS<br>CC <u>CU</u> CA <u>U</u> CC <u>A</u> CU <u>Ga</u> GU <u>G</u> CA <u>UU</u><br>UG <u>CA</u> C <u>u</u> CA <u>G</u> U <u>GG</u> AU <u>G</u> AG <u>GG</u> UU |
|                               | 9            | 15                  | siRs331_C9(C15)  | SS<br>CC <u>CU</u> CA <u>U</u> CC <u>A</u> CU <u>G</u> U <u>c</u> UG <u>CA</u> <u>UU</u><br>UG <u>CA</u> gA <u>CA</u> GU <u>GG</u> AU <u>G</u> AG <u>GG</u> UU  |
|                               | 11           | 14                  | siRs331_C11(A14) | SS<br>CU <u>CC</u> CU <u>CA</u> U <u>CC</u> A <u>Ca</u> GU <u>GU</u> UU<br>CA <u>CA</u> C <u>u</u> G <u>U</u> GG <u>AU</u> GAG <u>GG</u> A <u>GU</u> U          |
|                               | 11           | 15                  | siRs331_C11(C15) | SS<br>CU <u>CC</u> CU <u>CA</u> U <u>CC</u> A <u>CU</u> c <u>U</u> GU <u>GU</u><br>CA <u>CA</u> gA <u>GU</u> GG <u>AU</u> GAG <u>GG</u> A <u>GU</u> U           |

<sup>a)</sup> ss: sense-strand, as: antisense-strand.

<sup>b)</sup> The nucleotides corresponding to the SNP sites and mismatched nucleotides are underlined and represented in small letters, respectively.

Table S6. IC50 values of the siRNAs examined in Fig. S6

| SNP ID   | siRNA name      | IC50 (nM)                                |                                               | IC50 (nM)                                 |                                              |
|----------|-----------------|------------------------------------------|-----------------------------------------------|-------------------------------------------|----------------------------------------------|
|          |                 | Target allele<br>( <i>Renilla Luc.</i> ) | Non-target allele<br>( <i>Photinus Luc.</i> ) | Target allele<br>( <i>Photinus Luc.</i> ) | Non-target allele<br>( <i>Renilla Luc.</i> ) |
| rs363099 | siRs099_T10     | 0.21 ± 0.081                             | >20                                           | 0.18 ± 0.107                              | >20                                          |
|          | siRs099_C9      | 0.20 ± 0.077                             | 0.86 ± 0.171                                  | 0.12 ± 0.063                              | 0.26 ± 0.055                                 |
|          | siRs099_C9(G14) | 0.29 ± 0.048                             | >20                                           | 0.25 ± 0.043                              | >20                                          |
| rs362331 | siRs331_T9      | 0.07 ± 0.015                             | 0.52 ± 0.431                                  | 0.05 ± 0.007                              | 0.57 ± 0.125                                 |
|          | siRs331_T10     | 0.12 ± 0.032                             | 7.63 ± 2.663                                  | 0.15 ± 0.074                              | 0.98 ± 0.157                                 |
|          | siRs331_C9      | 0.48 ± 0.151                             | 0.94 ± 1.685                                  | 0.18 ± 0.033                              | 0.38 ± 0.044                                 |
|          | siRs331_C9(A14) | 0.28 ± 0.066                             | 8.19 ± 1.131                                  | 0.11 ± 0.032                              | >20                                          |
|          | siRs331_C9(C15) | 0.14 ± 0.080                             | >20                                           | 0.08 ± 0.033                              | >20                                          |
| rs362273 | siRs273_G9      | 0.27 ± 0.032                             | >20                                           | 0.19 ± 0.048                              | >20                                          |
|          | siRs273_A9      | 0.26 ± 0.031                             | >20                                           | 0.38 ± 0.092                              | >20                                          |
| rs362272 | siRs272_G12     | 0.43 ± 0.141                             | >20                                           | 0.46 ± 0.148                              | >20                                          |
|          | siRs272_A9      | 0.53 ± 0.219                             | >20                                           | 0.71 ± 0.483                              | >20                                          |

Averaged IC50 values (mean ± S.D., n=4) are indicated.

Data fallen short of the half-maximal inhibition at the highest concentration of siRNA (20nM) is indicated by '>20'.

Table S7. Synthetic DNA oligonucleotides used in construction of reporter alleles

| SNP ID (alleles, heterozygosity <sup>a)</sup> , exon) | Sequence name <sup>b)</sup> | 5' - sequence - 3' <sup>c)</sup>                                                                                                                                |
|-------------------------------------------------------|-----------------------------|-----------------------------------------------------------------------------------------------------------------------------------------------------------------|
| rs363099 (C/T, 0.333, exon 29)                        | C-allele                    | rs363099(C)-ss<br>rs363099(C)-as<br>ct agcatgCGTTTGGAGGGTTTCTCCGCTCAGCCTTGGATa<br>ggcctATCCAAGGCTGAGCGGA <del>AA</del> AACCCCTCCAAA <del>C</del> gcatg          |
|                                                       | T-allele                    | rs363099(T)-ss<br>rs363099(T)-as<br>ct agcatgCGTTTGGAGGGTTTCTTCGCTCAGCCTTGGATa<br>ggcctATCCAAGGCTGAGCGGA <del>AA</del> AACCCCTCCAAA <del>C</del> gcatg          |
| rs362331 (C/T, 0.494, exon 50)                        | C-allele                    | rs362331(C)-ss<br>rs362331(C)-as<br>ct agcatgCGCCTGCTCCCTCATCCACTGTGTGCACTTCAa<br>ggcctTGAAGTGCACACAGTGGATGAGGGAAGCAGGCGcatg                                    |
|                                                       | T-allele                    | rs362331(T)-ss<br>rs362331(T)-as<br>ct agcatgCGCCTGCTCCCTCATCTTACTGTGTGCACTTCAa<br>ggcctTGAAGTGCACACAGT <del>TA</del> GATGAGGGAAGCAGGCGcatg                     |
| rs362273 (A/G, 0.370, exon 57)                        | A-allele                    | rs362273(A)-ss<br>rs362273(A)-as<br>ct agcatgCCGAGAAGCTGCTGT <del>TA</del> CAGATCAA <del>CC</del> CGAGA<br>ggcctCTCGGGTTGATCTG <del>TA</del> GACAGCCTTCTCGgcatg |
|                                                       | G-allele                    | rs362273(G)-ss<br>rs362273(G)-as<br>ct agcatgCCGAGAAGCTGCTGTGCAGATCAA <del>CC</del> CGAGA<br>ggcctCTCGGGGTTGATCTG <del>CA</del> GACAGCCTTCTCGgcatg              |
| rs362272 (A/G, 0.374, exon 61)                        | A-allele                    | rs362272(A)-ss<br>rs362272(A)-as<br>ct agcatgCGGAGCCCTGCACGGCA <del>T</del> CCTTATGTGCTGga<br>ggcctCCAAGCACATAGAGGA <del>AG</del> CCGTTGCAAGGCTCCgcatg          |
|                                                       | G-allele                    | rs362272(G)-ss<br>rs362272(G)-as<br>ct agcatgCGGAGCCCTGCACGGCGT <del>C</del> CCTTATGTGCTGga<br>ggcctCCAAGCACATAGAGGA <del>AG</del> CCGTTGCAAGGCTCCgcatg         |

<sup>a)</sup> Heterozygosities are derived from the NCBI SNP database: <http://www.ncbi.nlm.nih.gov/snp>.

<sup>b)</sup> 'ss' and 'as' fixed to the names represent the sense- and anti-sense strand sequences, respectively.

<sup>c)</sup> SNP sites and linker sequences are underlined and represented in small letters, respectively.
